# Supplementary material for: Automated analysis of non-steroidal anti-inflammatory drugs in human plasma and water samples by in-tube solid-phase microextraction coupled to liquid chromatography-mass spectrometry based on a poly(4-vinylpyridine-co-ethylene dimethacrylate) monolith
Source: Royal Society of Chemistry journal article supplement (doi:10.1039/c1ay05412k), 2011-10-24
Supplement: c1ay05412k.pdf [file c1ay05412k.pdf]

## Supplementary information

### Automated analysis of non-steroidal anti-inflammatory drugs in human plasma and water samples by in-tube solid-phase microextraction coupled to liquid chromatography-mass spectrometry based on poly(4-vinylpyridine-co-ethylene dimethacrylate) monolith

Qiong-Wei Yu<sup>a</sup>, Xin Wang<sup>a</sup>, Qiao Ma<sup>a</sup>, Bi-Feng Yuan<sup>a</sup>, Hai-Bo He<sup>b</sup>, Yu-Qi

Feng<sup>a\*</sup>

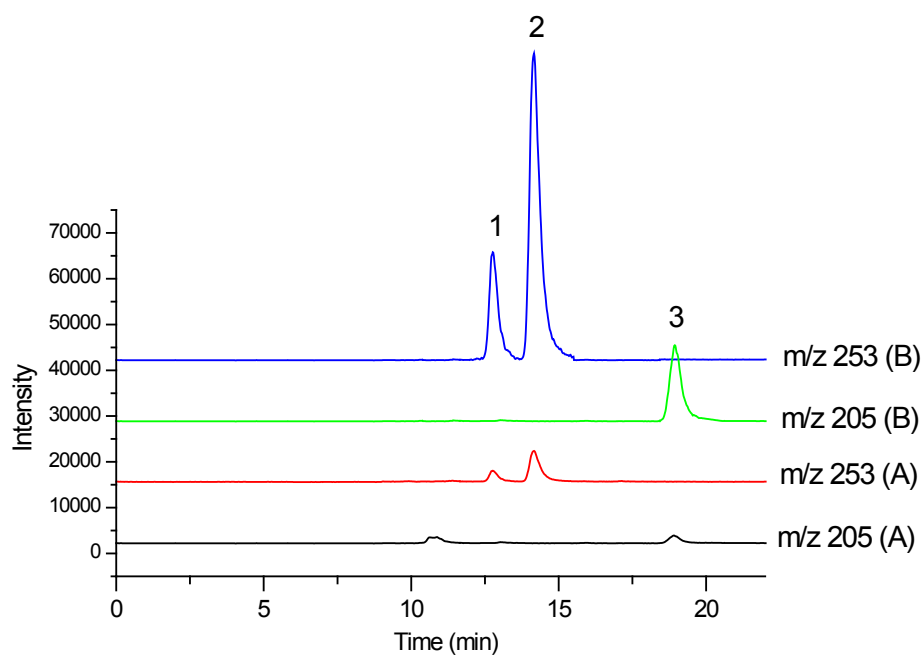

**Supplementary Figure.** The selected ion monitoring (SIM) chromatograms of three NSAIDs obtained by in-tube SPME/HPLC-MS method. (a) Human plasma spiked with NSAIDs (200 ng/mL for each); (b) the standard solution (the compounds were spiked at 200 ng/mL in purified water) ; Peaks: (1) KEP; (2)FEP; (3) IBP.
